# Supplementary material for: PVR (CD155) Expression as a Potential Prognostic Marker in Multiple Myeloma
Source: Research Square preprint supplement (doi:10.21203/rs.3.rs-1463725/v1), 2022-03-21
Supplement: Supplementary file 1 [file 6d3e89c5e9b1a9a4f1f0be4d.docx]

**Table S1.** Original data for TIGIT expression by flow cytometry

| **Patient** | **CD8+ T cells, %** | **NK cells, %** |
| --- | --- | --- |
| #1  #2  #3  #4  #5  #6  #7  #8  #9  #10  #11  #12  #13  #14 | 4.53  4.72  2.28  2.15  9.16  5.24  2.62  5.29  0.14  1.75  2.93  1.45  7.12  1.74 | 14.1  13.4  1.68  6.94  69.7  15.4  12.1  10.4  21.1  2.25  23.5  8.90  50.9  8.83 |

**Table S2.** ELISA data for soluble PVR and TIGIT protein levels

| **Patient** | **Soluble PVR, ng/mL** | **Soluble TIGIT, ng/mL** |
| --- | --- | --- |
| #1  #2  #3  #4  #5  #6  #7  #8  #9  #10  #11  #12  #13  #14  #15  #16  #17  #18  #19  #20  #21  #22 | 1.908  0.798  6.918  3.126  1.225  2.581  1.633  3.094  2.415  3.000  2.158  1.607  0.320  0.092  0.085  < 0.050  0.522  2.383  2.685  < 0.050  1.424  4.973 | 3.056  3.677  5.425  2.846  16.370  5.003  3.347  3.554  2.831  3.973  5.499  2.897  19.290  4.236  22.151  4.612  3.003  3.051  2.653  2.657  4.161  3.111 |
